# Supplementary material
Source: PubMed Central journal article supplement (PMC4096300)
Supplement: NIHMS587225-supplement-Supplementary_data.pdf [file NIHMS587225-supplement-Supplementary_data.pdf]

# **Supplemental Material: SRC-2 is an essential coactivator for orchestrating metabolism and circadian rhythm**

Erin Stashi, Rainer B. Lanz, Jianqiang Mao, George Michailidis, Bokai Zhu, Nicole M. Kettner, Nagireddy Putluri, Erin L. Reineke, Lucas C. Reineke, Subhamoy Dasgupta, Adam Dean, Connor R. Stevenson, Natarajan Sivasubramanian, Arun Sreekumar, Francesco DeMayo , Brian York, Loning Fu and Bert W. O'Malley

# Figure S1

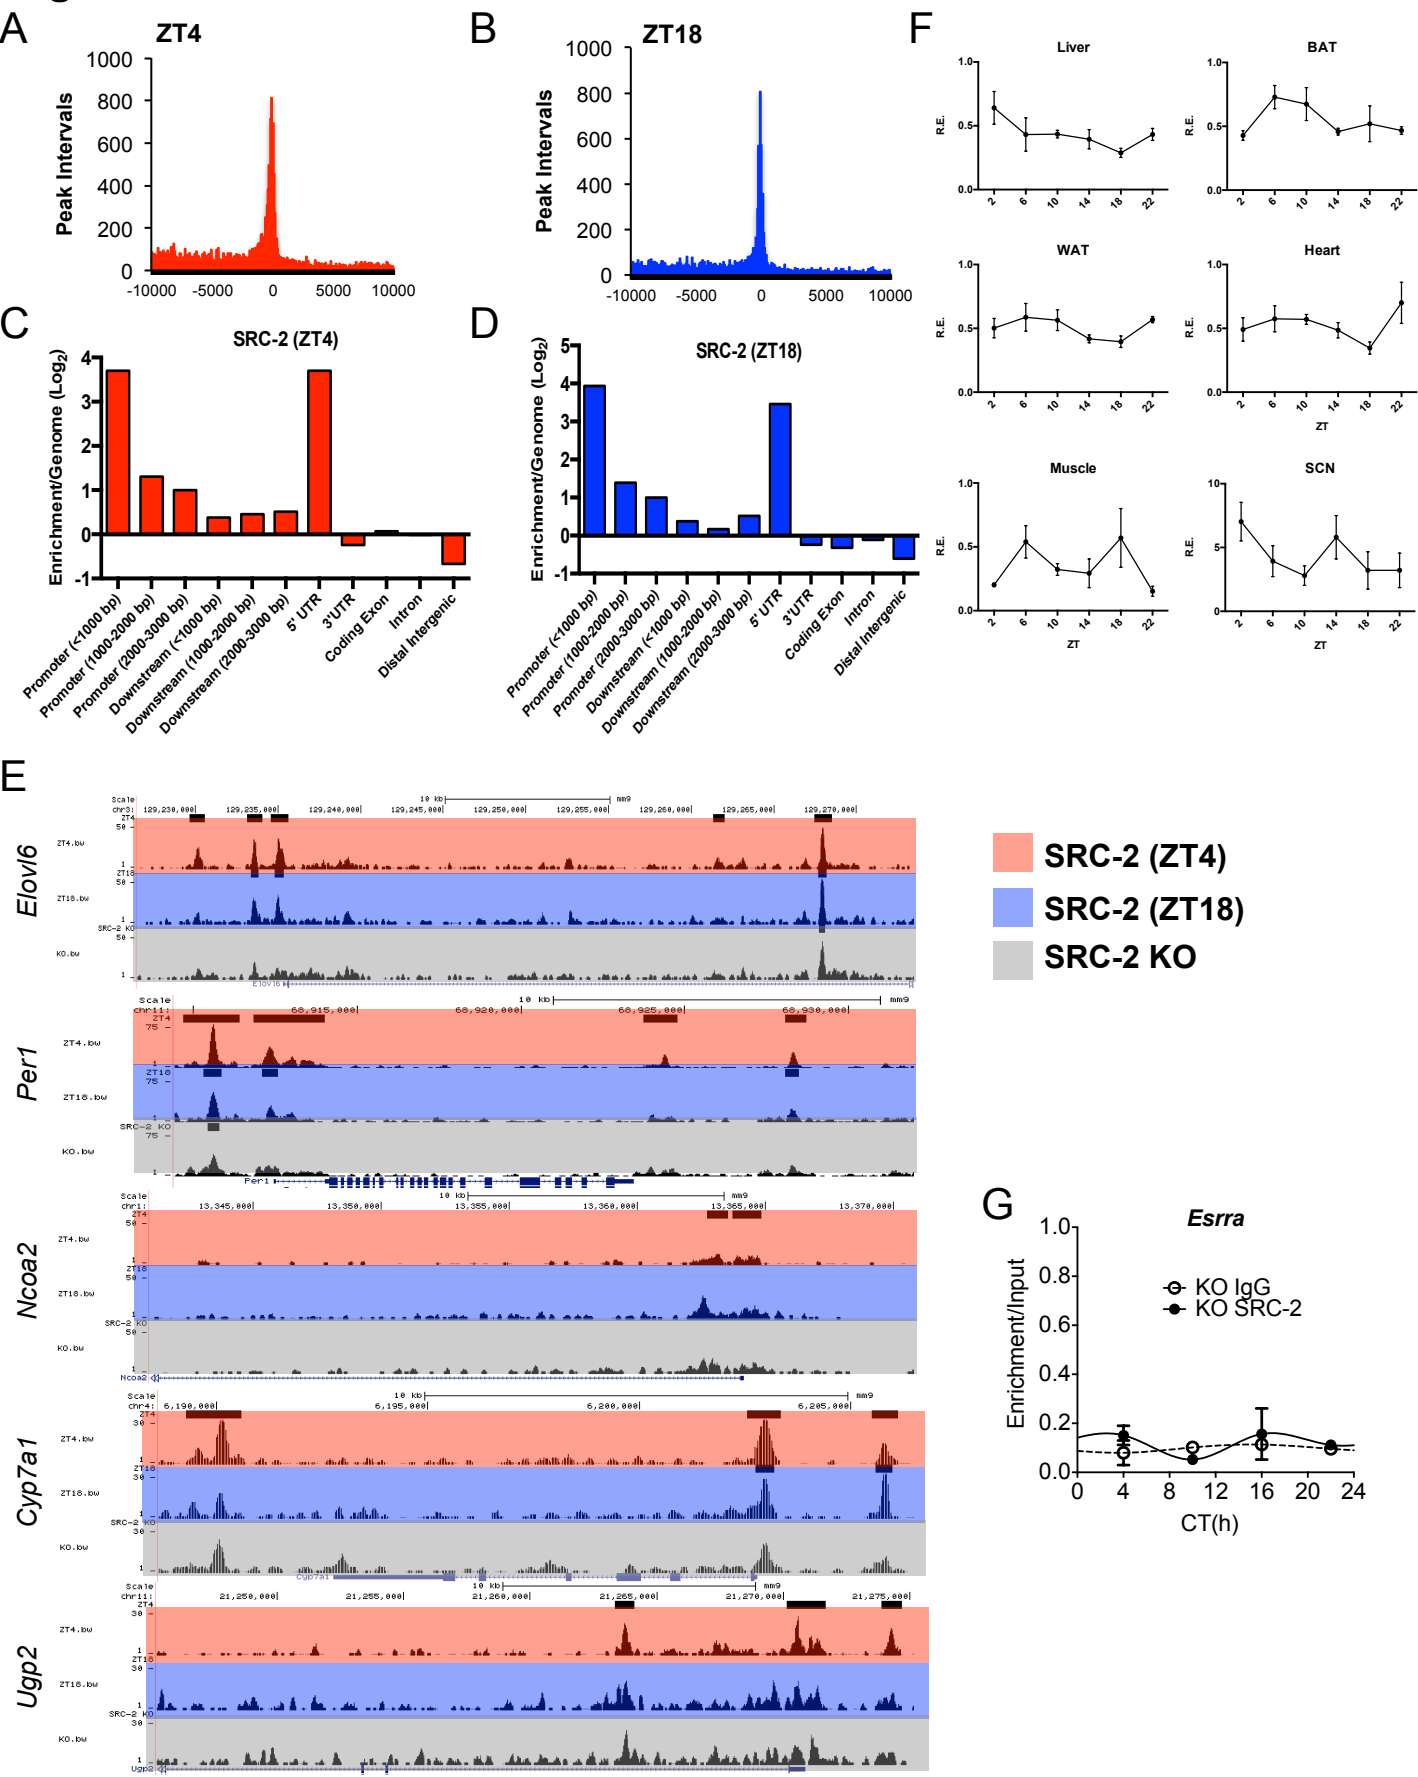



**Figure S3**

Daily Tau

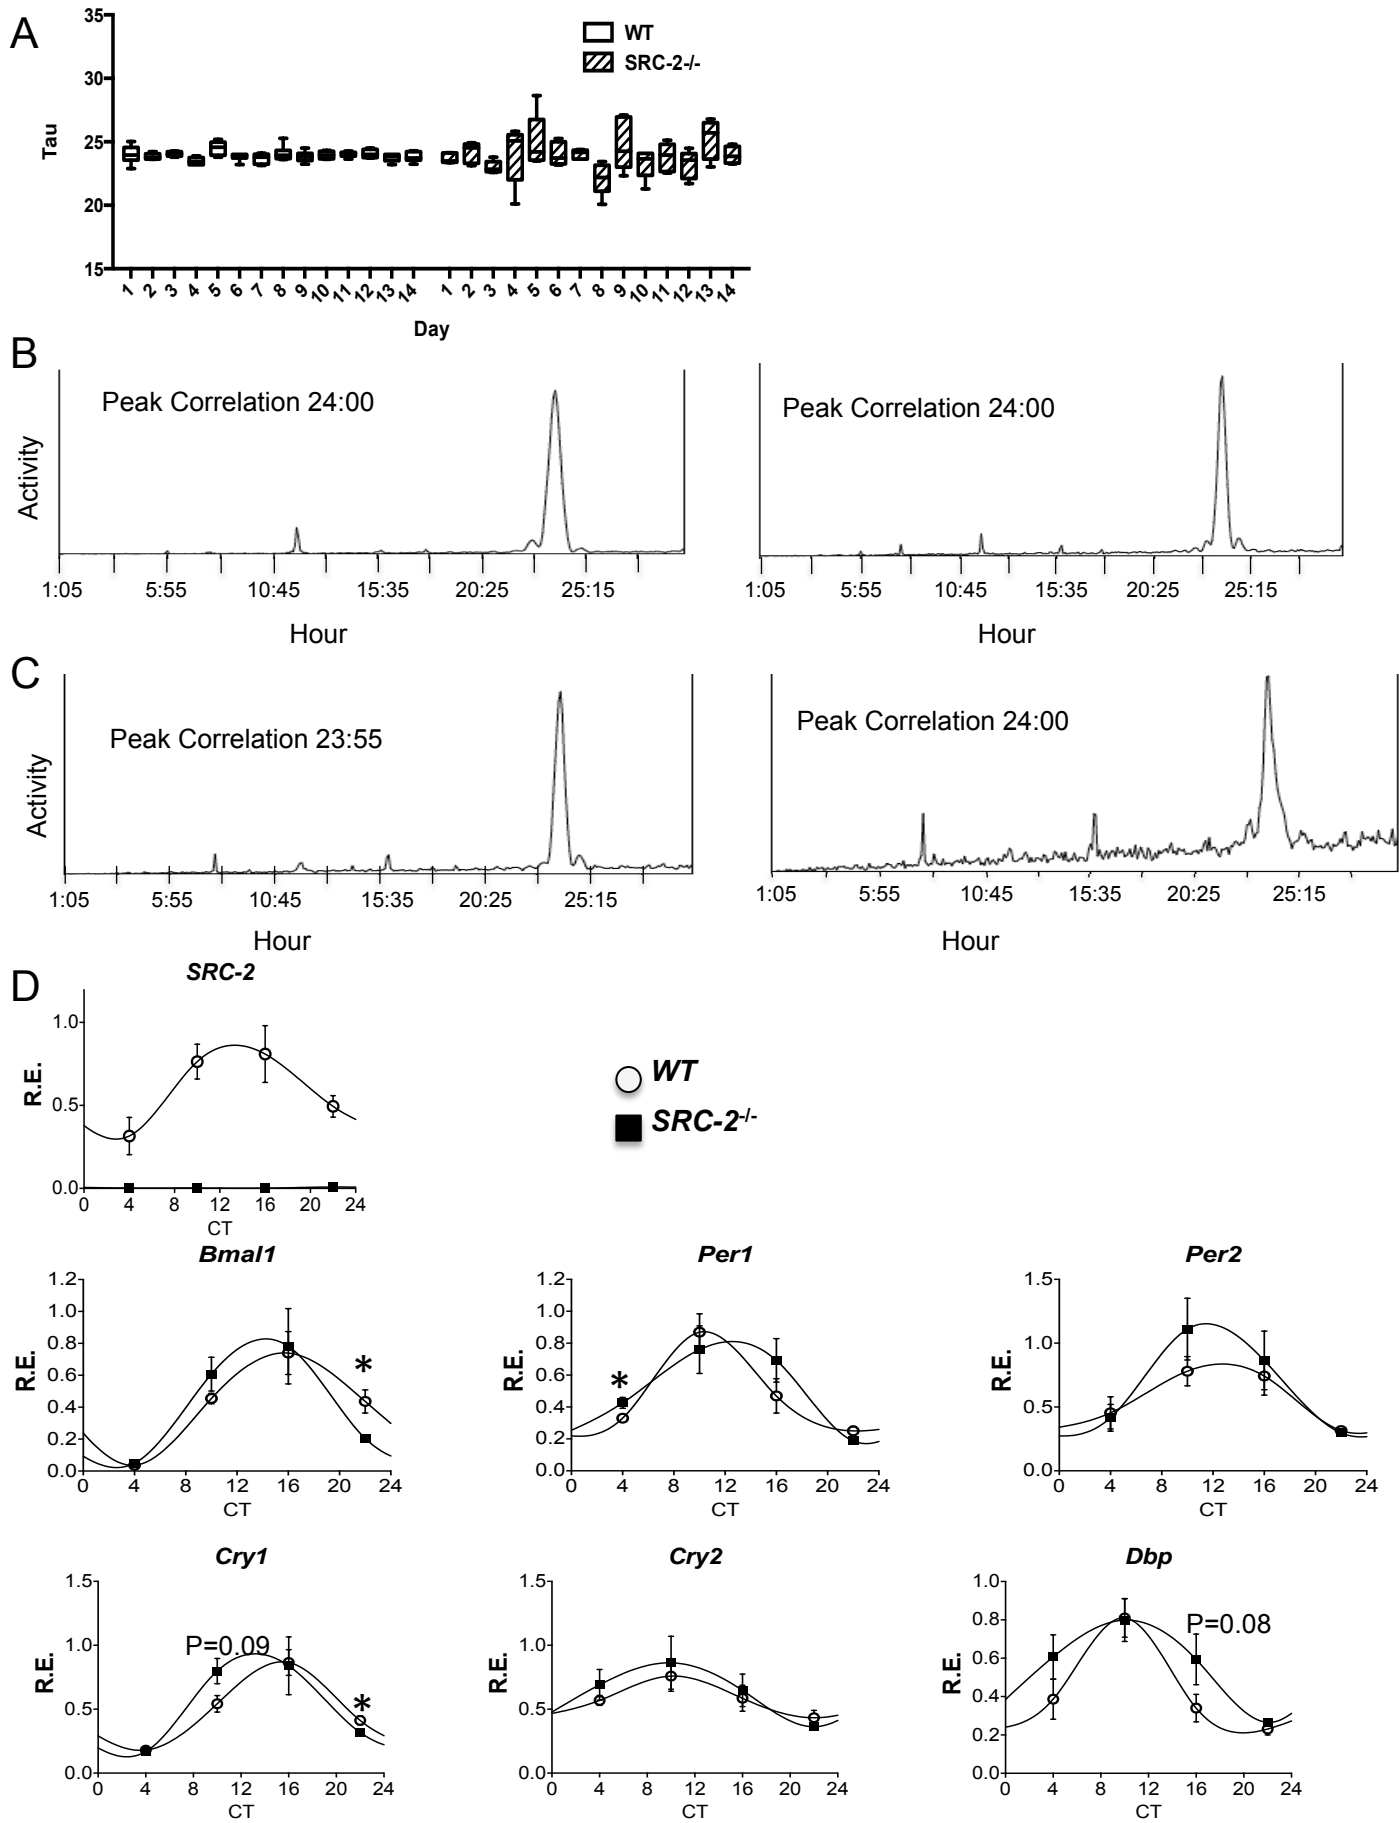

**Figure S4**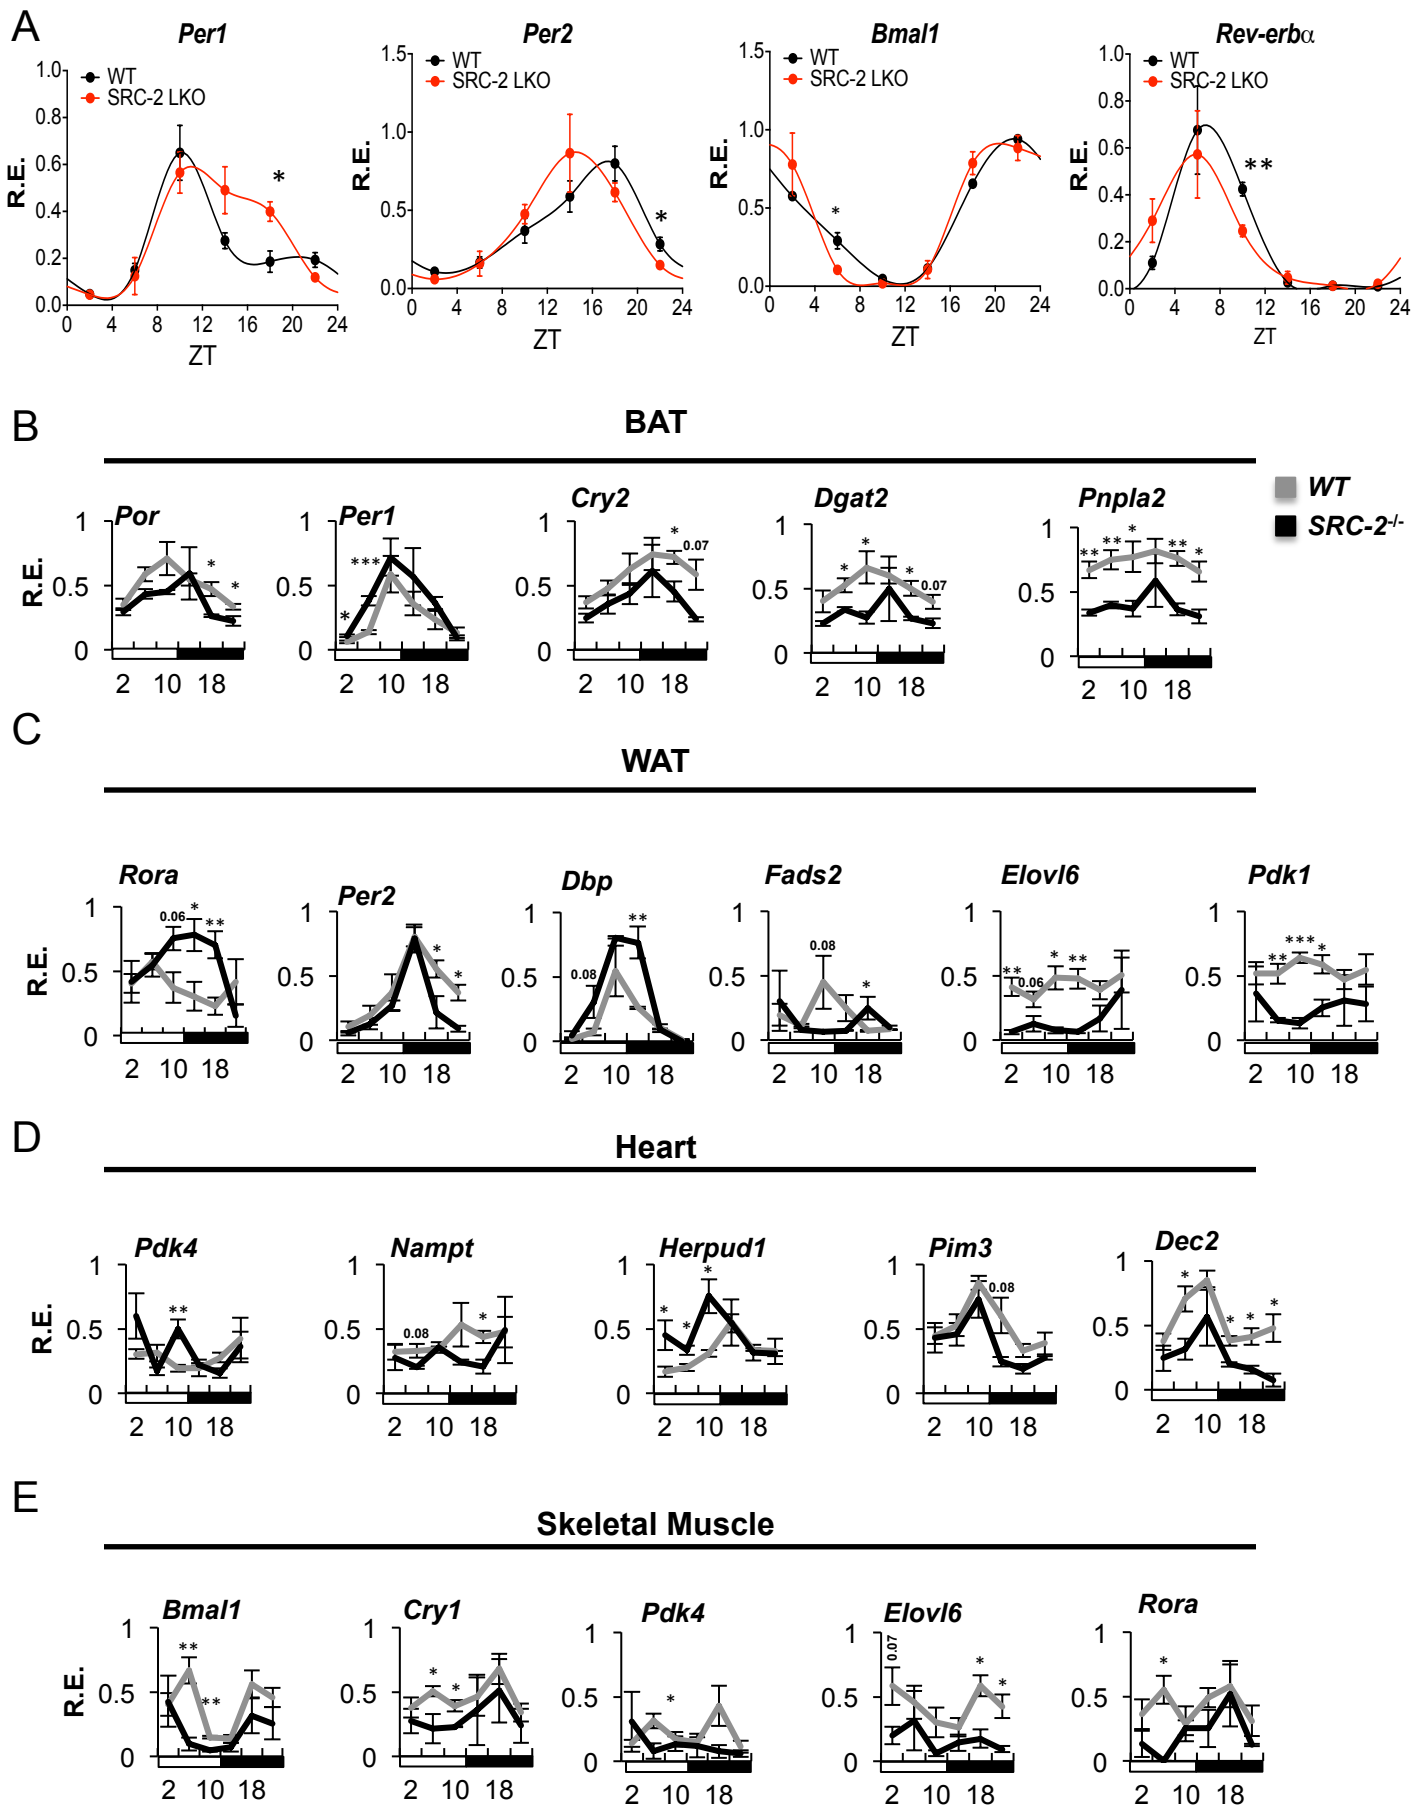

**Figure S5**

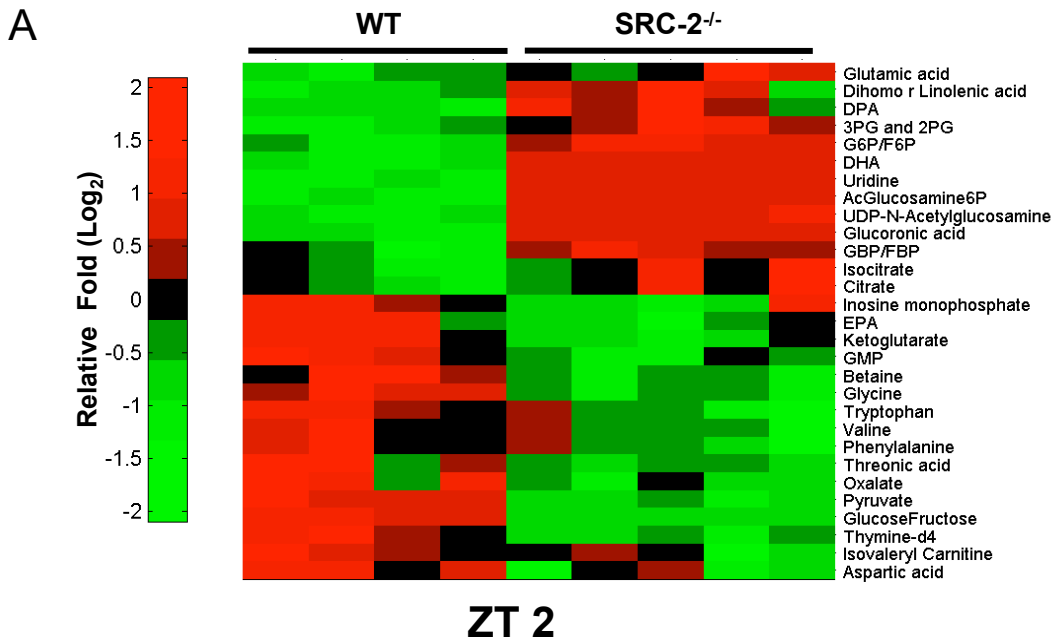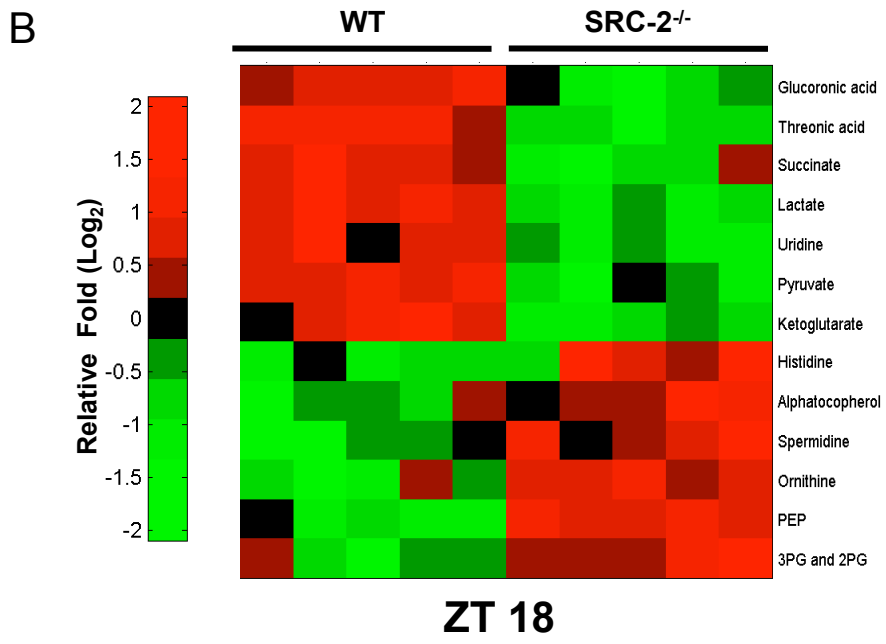

**Figure S6**

**A**

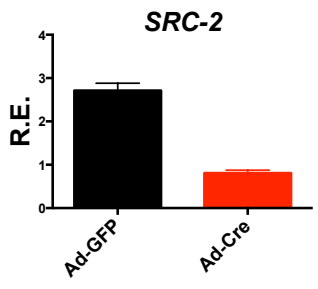

**B**

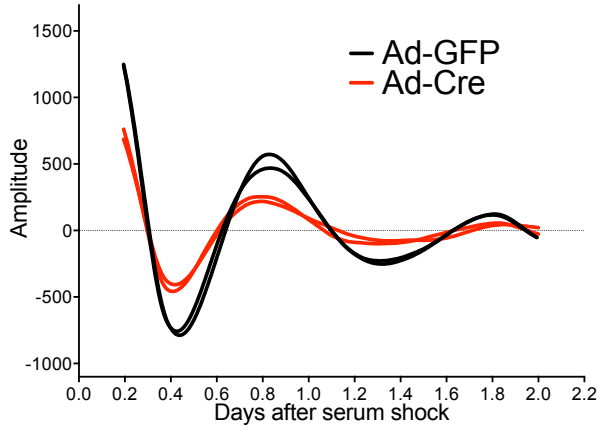

**C**

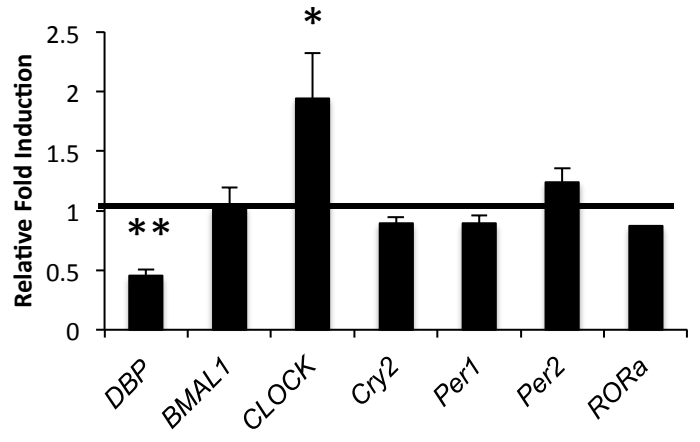

**D**

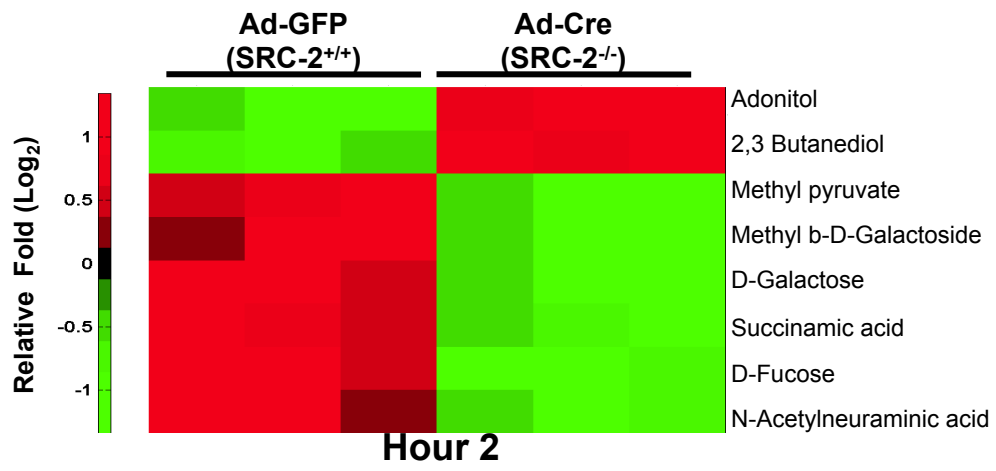

**E**

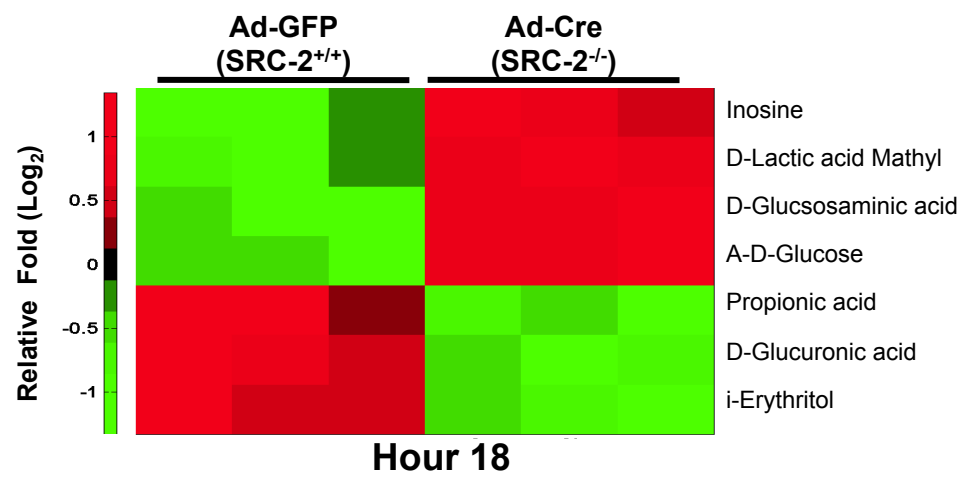

# Table S1

| GeneID | Gene Symbol | Description                                                                                    | Synonyms                                                                                       |
|--------|-------------|------------------------------------------------------------------------------------------------|------------------------------------------------------------------------------------------------|
| 11865  | Arntl       | aryl hydrocarbon receptor nuclear translocator-like                                            | Arnt3 BMAL1b Bmal1 MOP3 bHLHe5 bmal1b'                                                         |
| 20893  | Bhlhe40     | basic helix-loop-helix family, member e40                                                      | Bhlhb2 C130042M06Rik CR8 Clast5 Dec1 Sharp2 Stra13 Stra14                                      |
| 79362  | Bhlhe41     | basic helix-loop-helix family, member e41                                                      | Bhlhb2 Bhlhb3 DEC2 Sharp                                                                       |
| 12753  | Clock       | circadian locomotor output cycles kaput                                                        | 5330400M04Rik KAT13D bHLHe8 mKIAA0334                                                          |
| 12952  | Cry1        | cryptochrome 1 (photolyase-like)                                                               | AU020726 AU021000 Phl1                                                                         |
| 12953  | Cry2        | cryptochrome 2 (photolyase-like)                                                               | AV006279 D130054K12Rik                                                                         |
| 104318 | Csnk1d      | casein kinase 1, delta                                                                         | 120006A05Rik AA409348 D930010H05Rik                                                            |
| 13170  | Dbp         | D site albumin promoter binding protein                                                        | -                                                                                              |
| 67800  | Dgat2       | diacylglycerol O-acyltransferase 2                                                             | 0610010B06Rik DGAT-2                                                                           |
| 170439 | Elovl6      | ELOVL family member 6, elongation of long chain fatty acids (yeast)                            | C77826 FAE LCE MGC107467                                                                       |
| 26379  | Esrra       | estrogen related receptor, alpha                                                               | ERRalpha Err1 Estrra Nr3b1                                                                     |
| 56473  | Fads2       | fatty acid desaturase 2                                                                        | 2900042M13Rik Fadsd2                                                                           |
| 14118  | Fbn1        | fibrillin 1                                                                                    | AI536462 B430209H23 Fib-1 Tsk                                                                  |
| 14377  | G6pc        | glucose-6-phosphatase, catalytic                                                               | AW107337 G6Pase G6pt Glc-6-Pase                                                                |
| 232493 | Gys2        | glycogen synthase 2                                                                            | BC021322 LGS MGC29379                                                                          |
| 64209  | Herpud1     | homocysteine-inducible, endoplasmic reticulum stress-inducible, ubiquitin-like domain member 1 | Herp Mifl SUP                                                                                  |
| 55927  | Hes6        | hairy and enhancer of split 6 (Drosophila)                                                     | AI326893 bHLHb41                                                                               |
| 15378  | Hnf4a       | hepatic nuclear factor 4, alpha                                                                | HNF-4 Hnf4 Hnf4alpha MODY1 Nr2a1 Tcf14                                                         |
| 16828  | Ldha        | lactate dehydrogenase A                                                                        | Ldh1 Ldhm I7R2                                                                                 |
| 59027  | Nampt       | nicotinamide phosphoribosyltransferase                                                         | 1110035O14Rik AI314458 AI480535 NAMPRtase Pbef Pbef1 Visfatin                                  |
| 18030  | Nfil3       | nuclear factor, interleukin 3, regulated                                                       | AV225605 E4BP4                                                                                 |
| 17977  | Ncoa1       | nuclear receptor coactivator 1                                                                 | KAT13A SRC-1 SRC1 bHLHe74                                                                      |
| 17978  | Ncoa2       | nuclear receptor coactivator 2                                                                 | 530095N19 D1Ert433e GRIP-1 Grip1 KAT13C SRC-2 TIF-2 TIF2 bHLHe75                               |
| 17979  | Ncoa3       | nuclear receptor coactivator 3                                                                 | RP23-120P1.1 2010305B15Rik AW321064 Actr Aib1 KAT13B Rac3 Src3 Tram-1 Tram1 bHLHe42 p Cip pCip |
| 18143  | Npas2       | neuronal PAS domain protein 2                                                                  | MGC129355 MOP4 bHLHe9                                                                          |
| 23957  | Nr0b2       | nuclear receptor subfamily 0, group B, member 2                                                | SHP SHP-1 Shp1                                                                                 |
| 217166 | Nr1d1       | nuclear receptor subfamily 1, group D, member 1                                                | A530070C09Rik R75201                                                                           |
| 353187 | Nr1d2       | nuclear receptor subfamily 1, group D, member 2                                                | RVR Rev-erb                                                                                    |
| 11819  | Nr2f2       | nuclear receptor subfamily 2, group F, member 2                                                | 2700033K02Rik 9430015G03Rik ARP-1 Aporp1 COUP-TF2 COUP-TFII COUPTFB EAR3 SVP40 Tcfcoup2        |
| 26424  | Nr5a2       | nuclear receptor subfamily 5, group A, member 2                                                | AU020803 D1Ert308e Ftf LRH-1                                                                   |
| 18534  | Pck1        | phosphoenolpyruvate carboxykinase 1, cytosolic                                                 | AI265463 PEPCK Pck-1                                                                           |
| 18563  | Pcx         | pyruvate carboxylase                                                                           | Pc Pcb                                                                                         |
| 228026 | Pdk1        | pyruvate dehydrogenase kinase, isoenzyme 1                                                     | B830012B01 D530020C15Rik                                                                       |
| 27273  | Pdk4        | pyruvate dehydrogenase kinase, isoenzyme 4                                                     | AV005916                                                                                       |
| 18626  | Per1        | period homolog 1 (Drosophila)                                                                  | MGC102121 Per m-rigui mPer1                                                                    |
| 18627  | Per2        | period homolog 2 (Drosophila)                                                                  | mKIAA0347 mPer2                                                                                |
| 18628  | Per3        | period homolog 3 (Drosophila)                                                                  | 2810049O06Rik mPer3                                                                            |
| 223775 | Pim3        | proviral integration site 3                                                                    | BC026639 Kid1 MGC27707 MGC37517                                                                |
| 66968  | Plin5       | perilipin 5                                                                                    | 2310076L09Rik AI415325 AW109675 Lsdp5 MLDP PAT-1                                               |
| 66853  | Pnpla2      | patatin-like phospholipase domain containing 2                                                 | 0610039C21Rik 1110001C14Rik Atg TTS-2.2                                                        |
| 18984  | Por         | P450 (cytochrome) oxidoreductase                                                               | 4933424M13Rik CPR CYPOR                                                                        |
| 19013  | Ppara       | peroxisome proliferator activated receptor alpha                                               | 4933429D07Rik AW742785 Nr1c1 PPAR-alpha PPARalpha Ppar                                         |
| 19883  | Rora        | RAR-related orphan receptor alpha                                                              | 9530021D13Rik Nr1f1 ROR1 ROR2 ROR3 nmf267 sg staggerer tmgc26                                  |
| 20526  | Slc2a2      | solute carrier family 2 (facilitated glucose transporter), member 2                            | AI266973 Glut-2 Glut2                                                                          |
| 21685  | Tef         | thyrotroph embryonic factor                                                                    | 2310028D20Rik                                                                                  |
| 53376  | Usp2        | ubiquitin specific peptidase 2                                                                 | B930035K21Rik Ubp41                                                                            |
| 19791  | RN18S       | 18S Ribosomal RNA                                                                              | 18S                                                                                            |



# Table S2

## Gene pathways associated with metabolites

| Process                                      | 10Hrs    |
|----------------------------------------------|----------|
| Glycolysis / Gluconeogenesis                 | 5.00E-10 |
| Metabolism of xenobiotics by cytochrome P450 | 2.44E-4  |
| Ascorbate and aldarate metabolism            | 3.82E-4  |
| Pyrimidine metabolism                        | 5.26E-3  |

**Table S3**

| <b>UMLS ID</b> | <b>Disease</b>                    | <b>Log<sub>2</sub> Enrichment</b> |
|----------------|-----------------------------------|-----------------------------------|
| C0017920       | Glycogen Storage Disease Type I   | 2.80                              |
| C0015499       | Factor V Deficiency               | 2.80                              |
| C0231341       | Aging, Premature                  | 2.80                              |
| C0042880       | Vitamin K Deficiency              | 2.80                              |
| C0020623       | Hypolipoproteinemias              | 2.64                              |
| C0029128       | Optic Disk Drusen                 | 2.54                              |
| C0009940       | Convalescence                     | 2.54                              |
| C0751895       | Vasospasm, Intracranial           | 2.54                              |
| C0020479       | Hyperlipoproteinemia Type III     | 2.54                              |
| C0877792       | Sleep Disorders, Circadian Rhythm | 2.45                              |
| C0023817       | Hyperlipoproteinemia Type I       | 2.39                              |
| C0272375       | Antithrombin III Deficiency       | 2.32                              |
| C0398625       | Protein C Deficiency              | 2.28                              |
| C0282513       | Aphasia, Primary Progressive      | 2.28                              |
| C0007774       | Cerebral Arterial Diseases        | 2.13                              |
| C0035312       | Retinal Drusen                    | 2.13                              |
| C0242666       | Protein S Deficiency              | 2.13                              |
| C2717961       | Thrombotic Microangiopathies      | 2.13                              |
| C0018991       | Hemiplegia                        | 2.13                              |
| C0024408       | Machado-Joseph Disease            | 2.13                              |
| C0856761       | Budd-Chiari Syndrome              | 2.13                              |
| C0236811       | Chronobiology Disorders           | 2.06                              |
| C0021290       | Infant, Newborn, Diseases         | 2.04                              |
| C0043012       | Wakefulness                       | 1.99                              |
| C0042850       | Vitamin B Deficiency              | 1.96                              |
| C0752140       | Intracranial Embolism             | 1.96                              |
| C0023772       | Lipid Metabolism, Inborn Errors   | 1.90                              |
| C0028758       | Object Attachment                 | 1.90                              |
| C0338451       | Frontotemporal Dementia           | 1.88                              |

## Supplemental Figure Legends

### Figure S1, related to figure 1: SRC-2 binding sites in the murine liver at ZT4 and ZT18.

**A)** Histogram of the SRC-2 (ZT4) peak interval enrichment at the TSS. **B)** Histogram of the SRC-2 (ZT18) peak interval enrichment at the TSS. **C)** SRC-2 (ZT4) binding sites determined by CEAS analysis in the mouse hepatic genome. **D)** SRC-2 (ZT18) binding sites determined by CEAS analysis in the mouse hepatic genome. **E)** Snapshots of circadian target genes selected for alignment of SRC-2 (ZT4), SRC-2 (ZT18), and SRC-2 (KO) binding sites taken from the USCS genome browser (<http://genome.ucsc.edu/cgi-bin/hgGateway>) **F)** hd-qPCR of *SRC-2* expression across ZT 2, 6, 10, 14, 18, and 22 in liver, BAT, WAT, heart, muscle, and quantitation of *in situ* hybridization of *SRC-2* in the SCN. **G)** 24-hour SRC-2 hepatic ChIP in *SRC-2*<sup>-/-</sup> mice at the *Esrra* promoter.

### Figure S2, related to figure 2: SRC-2 occupancy enriches with BMAL1 for circadian and metabolic targets.

**A)** Snapshots of circadian target genes selected for alignment of SRC-2 (ZT4) and BMAL1 (CT4) (Koike et al., 2012) binding sites taken from the USCS genome browser (<http://genome.ucsc.edu/cgi-bin/hgGateway>). **B)** SRC-2 hepatic ChIP at ZT6 in WT and *SRC-2*<sup>-/-</sup> mice at the *Per1* promoter or untr10 (negative control). **C)** SRC-2 ChIP at ZT6 in WT and ZT6 *Bmal1*<sup>-/-</sup> mice and ZT18 in WT and ZT18 *Bmal1*<sup>-/-</sup> mice on the *SRC-2* promoter. **D)** BMAL1 ChIP at ZT6 in WT and ZT6 *SRC-2*<sup>-/-</sup> mice and ZT18 in WT and ZT18 *SRC-2*<sup>-/-</sup> mice on the *SRC-2* promoter. **E)** SRC-2 hepatic ChIP at ZT6 in WT and *SRC-2*<sup>-/-</sup> mice at the *SRC-2* promoter. **F)** Luciferase assay of the *SRC-2* promoter with expression constructs for SRC-2, BMAL1, and CLOCK in HepG2 cells. **G)** Luciferase assay on the *SRC-2* promoter with acute knockdown with siRNA targeting BMAL1. **H)** Relative mRNA expression by qPCR of *Bmal1* in siControl and siBMAL1 cells. **I)** Luciferase assay on the *SRC-2* promoter with acute knockdown with siRNA targeting SRC-2. **J)** Relative mRNA expression by qPCR *SRC-2* from siControl or siSRC-2 treated cells. **K)** *In vivo* co-immunoprecipitation of BMAL1/SRC-2 and CLOCK/SRC-2 at ZT6 in the liver. **L)** *In vitro* pull-down of BMAL1 with GST or GST-SRC-2 fragments using purified full length BMAL1. Data are graphed as the mean ± s.e.m. \*\*p<0.01 versus WT mice.

**Figure S3, related to figure 3: Daily *Tau* values of L/D activity and loss of SRC-2 results in altered central circadian clock gene expression in the SCN.**

**A)** Daily *Tau* values associated with L/D wheel running activity in WT and *SRC-2*<sup>-/-</sup> male mice (N = 6). **B)** Periodograms for WT mice in Figure 3A. **C)** Periodograms for *SRC-2*<sup>-/-</sup> mice in Figure 3A. **D)** Temporal expression of genes measured by qPCR in the SCN of entrained in WT and *SRC-2*<sup>-/-</sup> mice at CT 4, 10, 16, and 22 (N = 3-4). The maximal value from each analyzed gene was normalized to 1. Data are graphed as the mean ± s.e.m. \*p<0.05 versus WT mice.

**Figure S4, related to figure 4: Loss of SRC-2 results in aberrant peripheral circadian clock and metabolic gene expression in brown and white adipose tissues.**

**A)** qPCR analysis of temporal gene expression in liver from entrained WT and *SRC-2* liver-specific knockout (LKO) littermate male mice **B)** hd-qPCR analysis of temporal gene expression in BAT from entrained WT and *SRC-2*<sup>-/-</sup> littermate male mice. **C)** hd-qPCR analysis of circadian gene expression in WAT from entrained WT and *SRC-2*<sup>-/-</sup> littermate male mice. **D)** hd-qPCR analysis of temporal circadian and metabolic gene expression in the heart from entrained WT and *SRC-2*<sup>-/-</sup> littermate male mice. **E)** hd-qPCR analysis of circadian and metabolic gene expression in skeletal muscle from entrained WT and *SRC-2*<sup>-/-</sup> littermate male mice. The maximal value from each analyzed gene was normalized to 1. Data are graphed as the mean ± s.e.m. \*p<0.05, \*\*p<0.01, \*\*\*p < 0.001 versus WT mice (N = 3-5).

**Figure S5, related to figure 5: SRC-2 ablation impacts the hepatic metabolome. A)** Heat map of metabolites altered at ZT2 between WT and *SRC-2*<sup>-/-</sup> mice. **B)** Heat map of metabolites altered at ZT18 between WT and *SRC-2*<sup>-/-</sup> mice. \*p<0.05 versus WT mice.

**Figure S6, related to figure 6: SRC-2 deletion significantly disrupts the cell-autonomous clock.**

**A)** qPCR analysis of *SRC-2* knockout as compared to Ad-GFP and Ad-Cre-GFP treated MEFs. **B)** Real time bioluminescence analysis of Ad-GFP and Ad-Cre-GFP treated MEFs infected with Per2-luc construct (Lee et al., 2011b) **C)** qPCR analysis of expression profiles of circadian genes after 4 hours of synchronization in primary hepatocytes isolated from WT and *SRC-2*<sup>-/-</sup> (N = 3) male littermate mice. Data represent two sets of triplicates of pooled hepatocytes and WT normalized to 1. Data are graphed as the mean ± s.e.m. \*p<0.05

versus WT mice. **D)** Heat map of metabolites altered at Hour 2 between Ad-GFP and Ad-Cre-GFP treated MEFs. **E)** Heat map of metabolites altered at Hour 18 between Ad-GFP and Ad-Cre-GFP treated MEFs.

**Table S1, related to figure 3: hd-qPCR gene list.**

List of genes on the hd-qPCR array used to examine temporal expression of circadian, NR, and metabolic genes in the liver, BAT, WAT, heart, and skeletal muscle across a 24 hour period.

**Table S2, related to figure 6: Enriched pathways from the Ad-GFP and Ad-Cre-GFP treated MEFs from the phenotyping array.**

Functional analysis on gene sets (R-package GSA) enriched in carbon metabolism using KEGG-derived pathways.

**Table S3, related to figure 2: Enriched diseases from the overlapping SRC-2 and BMAL1 binding sites.**

Analysis on gene sets enriched using Genopedia on the HuGE Navigator.

## **Methods Summary**

### **Immunoblot**

Immunoblot analyses were performed as described previously (Nishihara et al., 2003). Briefly, proteins separated by SDS-PAGE were transferred to nitrocellulose membranes, blocked in TBST buffer supplemented with 5% bovine serum albumin (BSA) and incubated overnight with primary antibody. Blots were incubated with an appropriate secondary antibody coupled to horseradish peroxidase, reacted with ECL reagents per the manufacturer's (Thermo) suggestion and detected on X-ray film by autoradiography.

### **Co-immunoprecipitation and *In vitro* Pull-down**

For co-immunoprecipitation, HepG2 cells were synchronized with 50% horse serum for two hours (Balsalobre et al., 1998) and for *in vivo* co-immunoprecipitation, protein was isolated from the livers of entrained mice at ZT6 and ZT18, respectively. Lysate was incubated with SRC-2 (BD), BMAL1 (Abcam), CLOCK (Cell Signaling), or IgG (Cell Signaling) antibodies followed by the addition of Protein A Dynabeads (Life Technologies). Eluted

proteins were separated by SDS-PAGE, transferred to nitrocellulose membranes and immunoblotted for SRC-2, BMAL1, and CLOCK.

For the *in vitro* pull-down, equal concentrations of the GST-SRC-2 fragments (Li, 2003), as determined by Coomassie staining, were incubated with full-length recombinant BMAL1 (Ye et al., 2011). After incubation, proteins were washed repeatedly with PBS and 10% input of BMAL1 was used as a loading control. Fragments were separated by SDS-PAGE and then immunoblotted for detection of BMAL1 (Abcam).

### **Plasmids and Constructs**

Cloning of the *SRC-2* luciferase reporter construct was accomplished by PCR amplification of WT mouse genomic DNA using the Phusion High-Fidelity PCR kit (FINNZYMES) with the primer pairs: 5'-gggtacCATGGAGTTCTTTACGCTACTG-3' and 5'-gaagatcTGTTCCCGTGTTAATAACTGCTG-3'. The resulting PCR product was digested with *Bgl*III and subcloned into pGL3-basic vector (Promega), which was digested with *Acc*65*i* and blunted with Klenow Enzyme followed by *Bgl*III digestion. The integrity of the final construct was verified by DNA sequencing. The resulting construct was designated as pGL3-*SRC-2* (-1933 to +61).

### **Luciferase Assays**

For transient-transfection assays, HepG2 cells were plated overnight and transfected with expression plasmids for SRC-2, BMAL1, CLOCK, Cry1 and the pGL3-Basic-*Per1* (-7,200 to +20) or pGL3-*SRC-2* (-1933 to +61) plasmids containing the luciferase reporter using Fugene 6 (Promega) or with siRNA against BMAL1 (Silencer Select), SRC-2 (Thermo Scientific), or Control (Silencer Select) using Lipofectamine (Life Technologies). Cell lysates were prepared 48 hours post-transfection, and luciferase activities were measured with a luciferase assay kit (Promega) and normalized to total protein. Lumicycle analysis was performed using a Lumicycle (Actimetrics). MEFs were cultured with 0.1 mM Luciferin in 35 mm tissue culture dishes.

### **Running Wheel Analysis**

Locomotor activity of WT and *SRC-2*<sup>-/-</sup> mice (N=6) individually housed with MiniMitter running wheels was recorded using the VitalView® Data Acquisition System. Mice were entrained for at least two weeks in 12 hour L/D cycles under constant temperature and humidity. Mice were then placed under free running conditions (24 hour D/D) cycles for 1 week.

## **Non-Radioactive *In situ* hybridization (ISH)**

WT mice were entrained and whole brain tissue was isolated at ZT 2, 6, 10, 14, 18 and 22. Tissue was serially sectioned at 25  $\mu$ M (N=3-4). Non-radioactive ISH was performed and quantified as previously described with the *SRC-2* probe (Carson et al., 2005; Yaylaoglu et al., 2005).

## **Metabolic Profiling**

Comprehensive Lab Animal Monitoring System (CLAMS) Calorimetry (Columbus Instruments) was used for 24 hour monitoring of food intake. WT and *SRC-2*<sup>-/-</sup> mice were acclimated to the chambers for at least one week and *ad libitum* food intake was monitored for 72 hours.

## **Nanoliter High definition Real-Time qPCR (hd-qPCR)**

Liver, skeletal muscle, heart, WAT, and BAT were collected from entrained WT and *SRC-2*<sup>-/-</sup> littermate male mice and flash frozen at designated ZTs. mRNA was isolated using the RNeasy Mini Kit (Qiagen). Reverse transcription and hd-qPCR were performed on a WaferGen Biosystems SmartChip System (Chen et al., 2012). Data were normalized to 18S. Similar results (data not shown) were obtained in a parallel experiment using the Applied Biosystems/LifeTechnologies Open Array QuantStudio 12K Flex instrument.

## **qPCR**

Total mRNA was isolated from WT primary hepatocytes, murine embryonic fibroblasts (MEFs), liver, or the SCN with RNeasy Kit (Qiagen). Reverse transcription was carried out using Superscript III (Life Technologies) per the manufacturer's instructions. For gene expression analyses, qPCR was performed using the Taqman system with sequence-specific primers and the Universal Probe Library (Roche). All data were analyzed with 18S as the endogenous control. All qPCR primer sequences are available upon request.

## **Primary Hepatocytes**

Primary hepatocytes were isolated from WT and *SRC-2*<sup>-/-</sup> male littermate mice (N = 3), pooled and plated in triplicate as previously described (Chopra et al., 2008; Matsumoto, 2006). Primary hepatocytes were synchronized with 50% horse serum for two hours (Balsalobre et al., 1998). Cells were isolated for RNA at

Hour 4 in two sets of triplicate using the RNeasy Mini Kit (Qiagen). WT fold induction was normalized to 1 and *SRC-2*<sup>-/-</sup> hepatocytes fold induction relative to WT was plotted.

### **Plasma Analysis**

Non-esterified fatty acids (NEFAs), triglycerides, and cholesterol were measured at the Mouse Metabolic Phenotyping Core at the University of Cincinnati (<http://mousephenotype.uc.edu/UC/>).

### **Mouse Embryonic Fibroblasts (MEFs)**

MEFs were isolated from *SRC-2*<sup>fl<sup>ox</sup>/fl<sup>ox</sup></sup> embryos as previously described (Xu, 2005). Cells were transfected with pBSSVD2005 (Addgene plasmid 21826) expressing the SV40 large T antigen. Cells were grown to confluency and split 1/10 for 5 passages to dilute slow growing, senescent cells essentially as described previously (Harding et al., 2009). *SRC-2*<sup>-/-</sup> MEFs were obtained by infecting *SRC-2*<sup>fl<sup>ox</sup>/fl<sup>ox</sup></sup> MEFs with adenovirus harboring an expression cassette for CRE recombinase. WT MEFs were infected with the corresponding control GFP adenovirus purchased from the Vector Development Core at Baylor College of Medicine. MEFs were plated in triplicate and synchronized. Time zero was set when normal media was added to the cells. Cells were isolated for RNA at 0-40 hours using the RNeasy Mini Kit (Qiagen).

### **Metabolomic Phenotyping Microarrays**

Screening was performed using 96-well plate phenotype microarrays (Biolog, Inc.) containing 88 different carbon substrates and 5 nucleotides as the energy source (Lee et al., 2011a; Putluri et al., 2011a). *SRC-2*<sup>fl<sup>ox</sup>/fl<sup>ox</sup></sup> MEFs infected with either Ad-Cre-GFP or Ad-GFP were seeded at an initial density of 2x10<sup>4</sup> cells per well in triplicate. Biolog Redox Dye Mix MA was added to each well according to the manufacturer's instructions and kinetic usage of the metabolites were monitored using the GEN III OmniLog ID System (Biolog, Inc.).

### **Metabolomic profiling**

**Reagents and internal standards:** High-performance liquid chromatography (HPLC) grade acetonitrile, methanol and water were purchased from Burdick & Jackson (Morristown, NJ). Mass spectrometry grade formic acid and internal standards namely, (Zeatine, [15N]-Tryptophan, [D4] Thymine, [15N] Anthranilic acid and N-Acetyl Aspartic acid -d3) were purchased from Sigma-Aldrich (St. Louis, MO). The calibration solution



containing multiple calibrates in acetonitrile/trifluoroacetic acid/water was purchased from Agilent Technologies (Santa Clara, CA).

The metabolomics analyses of all samples were executed using the protocol described previously (Putluri et al., 2011a; 2011b; Sreekumar et al., 2009). The raw data (LC-MS output) were normalized using internal standards. Prior to normalization, the median coefficient of variation (CV) of each internal standard was measured to select the appropriate standard for normalization in order to confirm consistency. A number of internal standards, including injection standards, process standards, and alignment standards were used to assure QA/QC targets were met and to control for experimental variability. Aliquots (200  $\mu$ L) of 10 mM solutions of isotopically labeled standards were mixed and diluted up to 8000  $\mu$ L (Final concentration 0.25 mM) and aliquoted into a final volume of 20  $\mu$ L. The aliquots were dried and stored at  $-80^{\circ}\text{C}$  until used further. The reproducibility of the profiling process was addressed at two levels; one by measuring only instrument variation, and the other by measuring overall process variation. To monitor instrument performance, 20  $\mu$ L of a matrix-free mixture of the internal standards described above, reconstituted in 100  $\mu$ L of methanol:water (50:50) was analyzed by MRM. In addition, the processes of metabolite extraction from the sample were monitored using pooled liver samples and spiked internal standards. In case of the former, 100 mg of pooled liver was extracted in tandem with the cell lines using buffer containing spiked internal standards as described above. In addition, internal standards were also spiked into cell lines during the extraction process. Importantly, the matrix-free internal standards and liver samples were analyzed twice daily. To address overall process variability, metabolomic studies were augmented to include a set of nine experimental sample technical replicates (also called matrix, abbreviated as MTRX), which were spaced evenly among the injections for each day.

**Sample preparation for mass spectrometry-based examination of metabolome:** Cell pellets were stored at  $-80^{\circ}\text{C}$  until analysis. For extraction of the metabolome, 100 mg of liver from each group of mice (five replicates) were homogenized in 1:4 ice cold water:methanol mixture containing an equimolar mixture of 5 standard compounds (Zeatine, [15N]-Tryptophan, [D4] Thymine, [15N] Anthranilic acid and N-Acetyl Aspartic acid -d3). This was followed by sequential addition of ice cold chloroform and water in 3:1 ratio and separation of the organic (methanol and chloroform) and aqueous solvents (water:methanol:chloroform:water; ratio 1:4:3:1). The aqueous extract was de-proteinized using a 3 KDa molecular filter (Amicon Ultracel -3K Membrane, Millipore Corporation, Billerica, MA) and the filtrate containing metabolites was dried under vacuum

Genevac EZ-2plus (Gardiner, NY). Prior to mass spectrometry, the dried extract was resuspended in an identical volume of injection solvent composed with appropriate mobile phase and subjected to liquid chromatography (LC) mass spectrometry.

**Liquid Chromatography/Mass Spectrometry (LC/MS):** The chromatographic separation of metabolites was performed using either reverse phase (RP) separation or normal phase online with 6490 triple Quadrupole QQQ mass spectrometers Agilent Technologies (Santa Clara, CA).

**Separation of Amino acids, CoA's and Carnitines:** Targeted profiling (SRM) for the Amino acids, CoA's and Carnitines in electro spray ionization (ESI) positive mode, the RP chromatographic method employed a gradient containing water (solvent A) and acetonitrile (ACN, solvent B, with both solvents containing 0.1% formic acid). Separation of metabolites was performed on a Zorbax Eclipse XDB-C18 column (50 × 4.6 mm i.d.; 1.8 µm, Agilent Technologies) maintained at 37°C. The gradient conditions were 0-6 minutes-2% B; 6.5 minutes-30% B, 7 minutes-90% B, 12 minutes- 95% B, followed by re-equilibration to the initial starting condition.

**Separation of TCA metabolites:** Targeting the TCA metabolites, the normal phase chromatographic separation was also used for targeted identification of metabolites. This employed solvents containing water (solvent A), with solvent A modified by the addition of 5 mM Ammonium acetate (pH 9.9), and 100% acetonitrile (ACN) solvent B. The binary pump flow rate was 0.2 ml/min with a gradient spanning 80% B to 2% B over a 20 minute period followed by 2% B to 80% B for a 5 min period and followed by 80% B for 13 minute time period. The flow rate was gradually increased during the separation from 0.2 mL/min (0-20 mins), 0.3 mL/min (20.1-25 min), 0.35 mL/min (25-30 min), 0.4 mL/min (30-37.99 min) and finally set at 0.2 mL/min (5 min). Metabolites were separated on a Luna Amino (NH<sub>2</sub>) column (4 µm, 100A 2.1 x 150 mm, Phenomenex) that was maintained in a temperature-controlled chamber (37°C). All the columns used in this study were washed and reconditioned after every 50 injections.

**Separation of TCA metabolites:** Targeted profiling (SRM) for the amino sugars, the RP chromatographic method employed a gradient containing water (solvent A) and acetonitrile (ACN), solvent B, with both solvents containing 0.1% formic acid in case of positive ESI; 1 mM ammonium acetate and 0.05% ammonium hydroxide in case of negative mode ESI. Separation of metabolites was performed on a Synergi-4u- Max-RP 80A (4 µm,

4.6 X 250 mm; Phenomenex, CA) maintained at 40°C. The binary pump flow rate was 0.2 ml/min with a gradient spanning 5% B to 10% B over a 15 minute, hold 10% B for 2 minutes 10% B to 90% B over 3 min, 90% B to 5% B over 3 minute, hold 5% B for 5 minutes time period.

**Separation of Fatty acids:** Targeted profiling (SRM) for the fatty acids, the RP chromatographic method employed a gradient containing water (solvent A) with 10 mM ammonium acetate (pH 8) and 100% methanol (solvent B). Separation of metabolites was performed on a Luna Phenyl Hexyl (3  $\mu$ m, 2 X 150 mm; Phenomenex, CA) maintained at 40°C. The binary pump flow rate was 0.2 ml/min with a gradient spanning 40% B to 50% B over a 8 minute, 50% B to 67% B over 5 min, hold 67% B for 9 min, 67% B to 100% B over 1 min, hold 100%B for 6 minutes time period, 100% B to 40% B over 1 minute and hold 40% B for 7 minutes time period.

**Separation of Nucleotides:** Targeted profiling (SRM) for the nucleotides, the RP chromatographic method employed a gradient containing water (solvent A) and acetonitrile (solvent B) with both solvents containing 0.1% formic acid. Separation of metabolites was performed on a SB-CN (1.8  $\mu$ m, 3 X 100mm; Agilent Technologies) maintained at 37°C. The binary pump flow rate was 0.3 ml/min with a gradient spanning 2% B hold for 6 min, 2% B to 30% B over a 0.5 minute, 30% B to 90% B over 0.5 min, 90% B to 95% B over 5 min, 95% B to 2% B over 1 minute hold 67% B for 7 minutes time period.

As controls to monitor the profiling process, an equimolar mixture of 5 standard compounds as described, and a characterized pool of mouse liver tissues were extracted and analyzed in tandem with the experimental samples. These controls were incorporated multiple times into the randomization scheme such that sample preparation and analytical variability could be constantly monitored. Furthermore, two blank runs were performed following the analysis of each sample to prevent any carryover of metabolites.

The mass spectrometry portion of the unbiased profiling platform is based on a 1290 SL Rapid Resolution LC and a 6490 triple Quadrupole (QQQ) mass spectrometer Agilent Technologies (Santa Clara, CA). The samples were independently examined in both positive and negative ionization modes using a dual Electrospray Ionization (ESI) source. The data acquisition during the analysis was controlled using the Mass Hunter workstation data acquisition software.

## Analysis of Metabolic Phenotyping Data

Measurements of metabolic phenotyping microarray data were obtained in 15-minute intervals for the time period 0-3.75 hours after plating the cells. The data were first corrected for background signal, obtained from readings of control wells. Specifically, the average value of the three control wells in each replicate, containing only Biolog media, was subtracted from the value of each metabolite on the corresponding plate. The adjusted values were then Z-score transformed. In the analysis, the 2.5 hour measurements were selected, since after extensive examination of the entire time course data, it was concluded that early time points exhibited high variability as the cells were settling down, while at later time points saturation effects were observed.

The metabolic flux through carbon substrate related pathways in *SRC-2<sup>flox/flox</sup>* MEFs infected with Ad-GFP vs *SRC-2<sup>flox/flox</sup>* MEFs infected with Ad-Cre-GFP cell lines were compared using heat maps and boxplots. In addition, gene set analysis (R-package GSA) was used to assess the overall enrichment of carbon substrates by mapping the detected metabolites to their corresponding KEGG-derived pathways. The pathways were ranked according to their Benjamini-Hochberg FDR-corrected P-values.

**Statistical Analyses:** The raw data (LC-MS output) was separately normalized in each method using the internal standard with lowest CV for that specific method. CoA metabolites, nucleotides, amino acid metabolites, TCA compounds and amino-sugars (positive mode) were normalized using L-Zeatin while amino-sugars (negative mode) and lipids were normalized using L-Tryptophan. The normalized data was log-transformed (log<sub>2</sub>) and used for one-way ANOVA (checking significance of time points in WT and KO groups separately) and two-way ANOVA (considering the type (WT, *SRC-2<sup>-/-</sup>*), time (ZT 2, 10, and 18) and their interaction) based on p-value (FDR adjusted using Benjamini-Hochberg method to adjust for multiple hypotheses). The relative expressions of the metabolites were also presented in the accompanying heat map. All the data analyses were performed using R<sup>®</sup> statistical software and dependent packages. Results are shown as the mean ± S.E.M. Standard statistical comparison of different groups was performed using two-tailed unpaired Student's *t*-test and the resulting values were adjusted using Benjamini-Hochberg FDR-corrected P-values.

## References

- Balsalobre, A., Damiola, F., and Schibler, U. (1998). A serum shock induces circadian gene expression in mammalian tissue culture cells. *Cell* 93, 929–937.
- Carson, J.P., Eichele, G., and Chiu, W. (2005). A method for automated detection of gene expression required for the establishment of a digital transcriptome-wide gene expression atlas. *J Microsc* 217, 275–281.
- Chen, H.J., Edwards, R., Tucci, S., Bu, P., Milsom, J., Lee, S., Edelmann, W., Gümüs, Z.H., Shen, X., and Lipkin, S. (2012). Chemokine 25-induced signaling suppresses colon cancer invasion and metastasis. *J. Clin. Invest.* 122, 3184–3196.
- Chopra, A.R., Louet, J.F., Saha, P., An, J., DeMayo, F., Xu, J., York, B., Karpen, S., Finegold, M., Moore, D., et al. (2008). Absence of the SRC-2 Coactivator Results in a Glycogenopathy Resembling Von Gierke's Disease. *Science* 322, 1395–1399.
- Harding, H.P., Zhang, Y., Scheuner, D., Chen, J.-J., Kaufman, R.J., and Ron, D. (2009). Ppp1r15 gene knockout reveals an essential role for translation initiation factor 2 alpha (eIF2 $\alpha$ ) dephosphorylation in mammalian development. *Proc. Natl. Acad. Sci. U.S.a.* 106, 1832–1837.
- Koike, N., Yoo, S.H., Huang, H.C., Kumar, V., Lee, C., Kim, T.K., and Takahashi, J.S. (2012). Transcriptional Architecture and Chromatin Landscape of the Core Circadian Clock in Mammals. *Science* 338, 349–354.
- Lee, A.J.X., Endesfelder, D., Rowan, A.J., Walther, A., Birkbak, N.J., Futreal, P.A., Downward, J., Szallasi, Z., Tomlinson, I.P.M., Howell, M., et al. (2011a). Chromosomal Instability Confers Intrinsic Multidrug Resistance. *Cancer Research* 71, 1858–1870.
- Lee, H.-M., Chen, R., Kim, H., Etchegaray, J.-P., Weaver, D.R., and Lee, C. (2011b). The period of the circadian oscillator is primarily determined by the balance between casein kinase 1 and protein phosphatase 1. *Proc. Natl. Acad. Sci. U.S.a.* 108, 16451–16456.
- Li, H. (2003). Synergistic Effects of Coactivators GRIP1 and  $\beta$ -Catenin on Gene Activation: CROSS-TALK BETWEEN ANDROGEN RECEPTOR AND Wnt SIGNALING PATHWAYS. *Journal of Biological Chemistry* 279, 4212–4220.
- Matsumoto, M. (2006). Dual role of transcription factor FoxO1 in controlling hepatic insulin sensitivity and lipid metabolism. *J. Clin. Invest.*
- Nishihara, E., Yoshida-Komiya, H., Chan, C.-S., Liao, L., Davis, R.L., O'malley, B.W., and Xu, J. (2003). SRC-1 null mice exhibit moderate motor dysfunction and delayed development of cerebellar Purkinje cells. *Journal of Neuroscience* 23, 213–222.
- Putluri, N., Shojaie, A., Vasu, V.T., Vareed, S.K., Nalluri, S., Putluri, V., Thangjam, G.S., Panzitt, K., Tallman, C.T., Butler, C., et al. (2011a). Metabolomic Profiling Reveals Potential Markers and Bioprocesses Altered in Bladder Cancer Progression. *Cancer Research* 71, 7376–7386.
- Putluri, N., Shojaie, A., Vasu, V.T., Nalluri, S., Vareed, S.K., Putluri, V., Vivekanandan-Giri, A., Byun, J., Pennathur, S., Sana, T.R., et al. (2011b). Metabolomic Profiling Reveals a Role for Androgen in Activating Amino Acid Metabolism and Methylation in Prostate Cancer Cells. *PLoS ONE* 6, e21417.
- Sreekumar, A., Poisson, L.M., Rajendiran, T.M., Khan, A.P., Cao, Q., Yu, J., Laxman, B., Mehra, R., Lonigro, R.J., Li, Y., et al. (2009). Metabolomic profiles delineate potential role for sarcosine in prostate cancer progression. *Nature* 457, 910–914.
- Xu, J. (2005). Preparation, culture, and immortalization of mouse embryonic fibroblasts. *Curr Protoc Mol Biol* Chapter 28, Unit28.1.

Yaylaoglu, M.B., Titmus, A., Visel, A., Alvarez-Bolado, G., Thaller, C., and Eichele, G. (2005). Comprehensive expression atlas of fibroblast growth factors and their receptors generated by a novel robotic in situ hybridization platform. *Dev. Dyn.* 234, 371–386.

Ye, R., Selby, C.P., Ozturk, N., Annayev, Y., and Sancar, A. (2011). Biochemical analysis of the canonical model for the mammalian circadian clock. *Journal of Biological Chemistry* 286, 25891–25902.
